# Supplementary material for: In vivo analysis of glaucoma-related features within the optic nerve head using enhanced depth imaging optical coherence tomography
Source: PLoS One. 2017 Jul 21;12(7):e0180128. doi: 10.1371/journal.pone.0180128 (PMC5521739; doi:10.1371/journal.pone.0180128)
Supplement: S1 Raw Data — (XLS) [file pone.0180128.s001.xls]

## Sheet: glaucoma
	Grupo	prontuario	sexo	idade	olho OD 1 OE 2	med	PIO	cg previa 1S 0N	MD	VFI	oct	volume tpl mm2	volume tpl mm2	VOL TPL MEDIO CONTROLE	mb-mb	mb-mb2	Media mb-mb	mb-LC	mb-LC2	Media mb-LC	tpl	tpl2	Media TPL	LC	LC2	Media LC	área lc	área LC2	Media área LC	Dificuldade medida linear LC 1-Sim 0-Nao	diag	Grupo 0-nl 1- glaucoma	paqui
1	glaucoma	196348	1	63	1	2	23	0	-5.05	92	68	0.23	0.25	0.24	1616	1616	1616	547	542	544.5	40	34	37	174	145	159.5	0.26	0.22	0.24	0	GPAA	1	616
2	glaucoma	1652594	1	55	1	0	14	1	-5.73	87	56	0.41	0.44	0.425	1639	1627	1633	393	393	393	120	135	127.5	159	131	145	0.22	0.24	0.23	0	GPAA	1	504
3	glaucoma	1514551	0	33	0	2	14	0	-8.42	83	77	0.39	0.35	0.37	1697	1691	1694	435	432	433.5	44	44	44	115	118	116.5	0.18	0.17	0.175	0	GPAA	1	488
4	glaucoma	1526093	1	56	1	3	16	0	-14.5	59	51	0.28	0.29	0.285	1152	1140	1146	397	386	391.5	187	202	194.5	61	55	58	0.08	0.08	0.08	0	GPAA	1	519
5	glaucoma	1517690	1	75	0	0	7	1	-8.95	81	47	0.37	0.4	0.385	1538	1507	1522.5	114	117	115.5	108	140	124	150	173	161.5	0.19	0.25	0.22	1	GPAF	1	542
6	glaucoma	185591	1	63	1	2	13	0	-8.36	86	80	0.42	0.43	0.425	1807	1804	1805.5	699	696	697.5	120	132	126	135	135	135	0.34	0.26	0.3	1	GPAA	1	525
7	glaucoma	194606	0	70	1	3	14	1	-25.12	26	46	0.2	0.36	0.28	1723	1731	1727	422	439	430.5	73	61	67	174	177	175.5	0.22	0.2	0.21	0	GPAA	1	534
8	glaucoma	1659058	1	65	1	3	15	0	-10.85	63	56	0.21	0.21	0.21	1441	1450	1445.5	592	593	592.5	52	51	51.5	119	119	119	0.14	0.15	0.145	0	GPAA	1	483
9	glaucoma	1638630	1	69	1	2	13	0	-16.98	56	91	0.28	0.28	0.28	1735	1726	1730.5	243	234	238.5	120	129	124.5	149	120	134.5	0.16	0.23	0.195	1	gl secundario	1	503
10	glaucoma	180416	1	71	1	0	14	1	-12.61	73	50	0.22	0.29	0.255	1302	1311	1306.5	329	335	332	32	29	30.5	140	146	143	0.12	0.14	0.13	0	GPAF	1	583
11	glaucoma	1636286	1	41	1	1	14	0	-3.79	88	65	0.48	0.54	0.51	1122	1125	1123.5	406	385	395.5	123	130	126.5	105	99	102	0.16	0.14	0.15	0	GPAA	1	495
12	glaucoma	127352	0	59	1	2	14	0	-10.37	81	63	0.25	0.3	0.275	1658	1652	1655	512	506	509	50	38	44	138	141	139.5	0.22	0.22	0.22	0	GPAA	1	487
13	glaucoma	1529116	1	52	0	0	10	1	-21.05	37	41	0.27	0.26	0.265	1888	1878	1883	436	449	442.5	49	55	52	137	103	120	0.18	0.2	0.19	1	GPAA	1	519
14	glaucoma	1614929	0	75	0	2	16	0	-2.71	94	81	0.29	0.33	0.31	1528	1529	1528.5	283	288	285.5	88	100	94	144	192	168	0.28	0.21	0.245	0	GPAF	1	510
15	glaucoma	1634380	1	45	0	3	16	0	-7.45	89	63	0.41	0.44	0.425	1873	1863	1868	382	400	391	190	180	185	175	148	161.5	0.22	0.31	0.265	0	GPAA	1	473
16	glaucoma	1520237	1	51	0	0	12	1	-21.41	38	60	0.36	0.38	0.37	1880	1876	1878	242	282	262	150	92	121	144	131	137.5	0.21	0.29	0.25	1	GPAA	1	555
17	glaucoma	1545480	1	59	1	1	11	0	-19.48	38	57	0.32	0.42	0.37	1569	1549	1559	801	801	801	45	40	42.5	160	141	150.5	0.16	0.16	0.16	1	Gl pigmentar	1	528
18	glaucoma	1654674	0	56	1	2	21	0	-4.42	93	69	0.29	0.35	0.32	1207	1216	1211.5	376	389	382.5	87	95	91	99	83	91	0.12	0.14	0.13	0	GPAF	1	488
19	glaucoma	1674948	1	41	0	2	13	0	-6.88	77	81	0.29	0.34	0.315	1594	1616	1605	477	500	488.5	72	72	72	113	91	102	0.14	0.16	0.15	1	Gl secundario corticoide	1	423
20	glaucoma	1518039	0	69	1	2	17	0	-6.57	93	66	0.36	0.39	0.375	1641	1668	1654.5	455	455	455	81	90	85.5	140	96	118	0.14	0.2	0.17	1	GPAF	1	473
21	glaucoma	1673896	0	87	1	2	15	0	-5.19	84	74	0.3	0.32	0.31	1559	1607	1583	343	352	347.5	123	111	117	97	95	96	0.15	0.17	0.16	0	GPAA	1	520
22	glaucoma	1674108	1	78	0	1	14	0	-3.05	95	71	0.35	0.37	0.36	1677	1669	1673	237	240	238.5	96	94	95	100	136	118	0.17	0.21	0.19	0	GPAA	1	460
23	glaucoma	1504046	1	67	1	1	17	1	-4.42	92	70	0.33	0.32	0.325	1616	1613	1614.5	371	368	369.5	102	105	103.5	116	108	112	0.15	0.16	0.155	0	GPAA	1	546
24	glaucoma	1677165	1	64	1	2	17	0	0.43	100	88	0.39	0.46	0.425	1911	1920	1915.5	274	300	287	124	104	114	144	160	152	0.3	0.26	0.28	0	GPAA	1	537
25	glaucoma	1678023	1	69	0	0	12	1	-24.99	20	55	0.15	0.27	0.21	1654	1663	1658.5	524	518	521	85	84	84.5	105	108	106.5	0.2	0.13	0.165	0	GPAF	1
26	glaucoma	TRSC unifesp	0	70	0	4	15	1	-18.57	45	58	0.27	0.22	0.245	1512	1510	1511	328	308	318	111	123	117	175	173	174	0.29	0.22	0.255	0	GPAF	1	493
27	glaucoma	JBGS unifesp	1	73	1	2	12	1	-2.75	97	86	0.52	0.58	0.55	1490	1511	1500.5	422	425	423.5	215	200	207.5	149	145	147	0.18	0.21	0.195	1	GPAA	1	516
28	glaucoma	LO unifesp	1	72	1	1	14	0	-4.16	92	82	0.49	0.46	0.475	1650	1647	1648.5	269	269	269	93	90	91.5	170	179	174.5	0.27	0.29	0.28	1	GPAA	1	461
29	glaucoma	173719	0	79	0	3	12	0	-4.01	95	58	0.51	0.51	0.51	1458	1462	1460	197	204	200.5	222	218	220	173	216	194.5	0.21	0.29	0.25	0	GPAA	1	502
30	glaucoma	1600039	0	76	0	1	16	0	-13.71	58	65	0.19	0.21	0.2	1632	1608	1620	389	391	390	78	72	75	168	165	166.5	0.2	0.16	0.18	0	GPAF	1	511

## Sheet: controle normal
	grupo	prontuario	sexo	idade	olho OD 1 OE 2	med	PIO	cg previa 1S 0N	volume tpl mm2	volume tpl mm2	VOL TPL MEDIO CONTROLE	mb-mb	mb-mb2	Media mb-mb	mb-LC	mb-LC2	Media mb-LC	tpl	tpl2	Media TPL	LC	LC2	Media LC	área lc	área LC2	Media área LC	Dificuldade medir LC 1-Sim 0-Nao	Grupo 0-nl 1- glaucoma
1	normal	1672437	0	47	0	0	12	0	0.48	0.41	0.445	1371	1331	1351	227	239	233	156	136	146	145	74	109.5	0.28	0.13	0.205	1	0
2	normal	1658061	0	80	0	0	13	1	0.46	0.46	0.46	1682	1714	1698	287	290	288.5	96	96	96	162	156	159	0.21	0.2	0.205	0	0
3	normal	1623068	1	72	1	0	17	1	0.79	0.75	0.77	1553	1529	1541	213	210	211.5	190	198	194	216	213	214.5	0.32	0.35	0.335	0	0
4	normal	1649924	0	57	1	0	14	1	0.62	0.6	0.61	1248	1236	1242	0	0	0	379	399	389	229	254	241.5	0.29	0.28	0.285	0	0
5	normal	1663170	0	73	1	0	12	1	0.66	0.68	0.67	1269	1232	1250.5	0	0	0	415	429	422	169	137	153	0.2	0.24	0.22	0	0
6	normal	1659072	1	69	0	0	14	0	0.58	0.52	0.55	1283	1332	1307.5	0	0	0	262	257	259.5	121	158	139.5	0.19	0.12	0.155	0	0
7	normal	1651483	0	56	0	0	20	1	0.73	0.69	0.69	1897	1935	1916	190	196	193	167	154	160.5	190	193	191.5	0.37	0.36	0.365	0	0
8	normal	1651690	0	75	1	0	16	1	0.88	0.9	0.89	1458	1461	1459.5	0	0	0	456	482	469	111	178	144.5	0.17	0.24	0.205	1	0
9	normal	ST unifesp	0	61	1	0	12	0	0.39	0.42	0.405	1379	1388	1383.5	293	290	291.5	86	86	86	142	137	139.5	0.23	0.21	0.22	0	0
10	normal	1615498	0	63	1	0	14	1	0.46	0.46	0.46	1405	1399	1402	457	457	457	74	71	72.5	157	146	151.5	0.24	0.19	0.215	1	0
11	normal	214852	0	59	1	0	12	0	0.77	0.76	0.765	1531	1482	1506.5	0	0	0	452	475	463.5	137	133	135	0.2	0.19	0.195	1	0
12	normal	1667626	1	68	1	0	14	0	0.37	0.38	0.38	1592	1434	1513	234	248	241	90	93	91.5	115	107	111	0.14	0.24	0.19	1	0
13	normal	120738	1	63	0	0	16	0	0.7	0.67	0.685	1659	1649	1654	430	433	431.5	190	201	195.5	182	154	168	0.25	0.27	0.26	0	0
14	normal	158587	1	55	0	0	17	1	0.48	0.45	0.45	1416	1407	1411.5	342	342	342	95	86	90.5	125	137	131	0.23	0.24	0.235	0	0
s	normal	MS unifesp	0	60	0	0	14	0	0.89	0.89	0.89	1670	1649	1659.5	0	0	0	417	439	428	130	130	130	0.21	0.24	0.225	1	0
16	normal	MGA unifesp	0	60	0	0	14	1	0.92	0.96	0.96	1558	1596	1577	0	0	0	529	517	523	190	159	174.5	0.29	0.33	0.31	0	0
17	normal	RCF unifesp	0	41	0	0	12	0	0.82	0.75	0.75	1387	1402	1394.5	0	0	0	361	364	362.5	171	170	170.5	0.25	0.24	0.245	0	0
18	normal	1539813	0	55	1	0	17	0	1.01	1.03	1.03	1330	1286	1308	0	0	0	770	751	760.5	131	179	155	0.18	0.21	0.195	1	0
19	normal	1670733	0	73	1	0	14	1	0.53	0.56	0.56	1641	1630	1635.5	242	236	239	71	77	74	207	204	205.5	0.25	0.3	0.275	1	0
20	normal	1502322	1	62	0	0	14	0	0.74	0.76	0.76	1176	1187	1181.5	0	0	0	532	526	529	191	194	192.5	0.26	0.27	0.265	0	0
21	normal	1677280	1	40	0	0	13	0	0.76	0.73	0.745	1742	1734	1738	248	248	248	190	173	181.5	103	141	122	0.15	0.23	0.19	1	0
22	normal	1603138	1	54	0	0	16	1	0.59	0.58	0.58	1571	1582	1576.5	218	218	218	139	131	135	200	208	204	0.25	0.25	0.25	0	0
23	normal	1607776	0	45	1	0	14	0	0.73	0.69	0.69	1753	1765	1759	147	148	147.5	208	205	206.5	189	181	185	0.25	0.29	0.27	1	0
24	normal	1544243	0	44	1	0	15	1	0.45	0.56	0.56	1358	1350	1354	142	148	145	122	107	114.5	159	214	186.5	0.25	0.18	0.215	0	0
25	normal	AFSA unifesp	1	55	1	0	14	0	0.52	0.51	0.515	1188	1173	1180.5	211	211	211	235	244	239.5	181	166	173.5	0.2	0.18	0.19	0	0
26	normal	TI unifesp	0	52	0	0	12	0	0.46	0.46	0.46	1605	1573	1589	376	382	379	70	90	80	134	128	131	0.21	0.19	0.2	1	0
27	normal	1513152	0	82	1	0	12	1	0.57	0.56	0.565	1518	1520	1519	0	0	0	318	312	315	174	178	176	0.25	0.25	0.25	0	0
28	normal	1628923	0	75	1	0	12	1	0.49	0.47	0.48	1580	1574	1577	35	26	30.5	193	205	199	213	202	207.5	0.28	0.29	0.285	0	0
29	normal	1548008	0	59	1	0	18	0	0.69	0.7	0.695	1324	1311	1317.5	0	0	0	408	395	401.5	175	153	164	0.28	0.23	0.255	0	0
30	normal	151680	0	66	1	0	12	1	0.95	0.98	0.965	1617	1606	1611.5	0	0	0	501	504	502.5	229	182	205.5	0.3	0.28	0.29	0	0
31	normal	135038	0	55	1	0	10	0	0.51	0.53	0.52	1488	1466	1477	429	449	439	105	111	108	153	145	149	0.23	0.26	0.245	1	0
32	normal	1609350	1	71	0	0	20	1	0.55	0.63	0.59	1674	1654	1664	96	93	94.5	180	189	184.5	157	160	158.5	0.26	0.27	0.265	1	0
33	normal	1687625	1	61	0	0	12	1	0.8	0.81	0.805	1547	1544	1545.5	0	0	0	414	415	414.5	189	187	188	0.28	0.29	0.285	0	0
34	normal	1545002	0	57	0	0	12	0	0.64	0.59	0.615	1617	1614	1615.5	58	67	62.5	269	242	255.5	163	143	153	0.26	0.2	0.23	0	0
